# Supplementary material
Source: PubMed Central journal article supplement (PMC8086108)
Supplement: 12966_2021_1125_MOESM1_ESM.pdf [file 12966_2021_1125_MOESM1_ESM.pdf]

### Additional File 1: Search Strategy

| <b>Component</b> | <b>Search Terms</b>                                                                                                                                                                                                                                                                          |
|------------------|----------------------------------------------------------------------------------------------------------------------------------------------------------------------------------------------------------------------------------------------------------------------------------------------|
| Exposure         | “economic recession” or “great recession” or “economic crisis” or “economic collapse*” or “economic downturn*” or “economic insecur*” or “financial crisis” or “credit crunch” or “foreclos*”<br>Database-appropriate MeSH terms were used.                                                  |
| Outcome          | “food*” or “food intake” or “food expenditure” or “food spending” or “food consumption” or “food purchas*” or “fruit” or “vegetable” or “sweet*” or “sugar-sweetened beverage*” or “dietary” or “macronutrient” or “micronutrient” or “eating”<br>Database-appropriate MeSH terms were used. |
| Other factors    | Non-English papers were excluded.<br>Papers were included if they were primary empirical, longitudinal studies.<br>Search was limited to humans                                                                                                                                              |
