# Supplementary material
Source: PubMed Central journal article supplement (PMC8086108)

## Additional File 2

We undertook a subgroup analysis of studies by Ng (2014), Todd (2014) and Todd (2017). These studies were conducted with the same baseline (2005-2006) and follow-up (2007-2008) periods in the USA and were weighted for the population. This meta-analysis gave an  $I^2$  value of 0.0%, indicating very low heterogeneity. The mean difference of calories per adult per day was - 99.5.

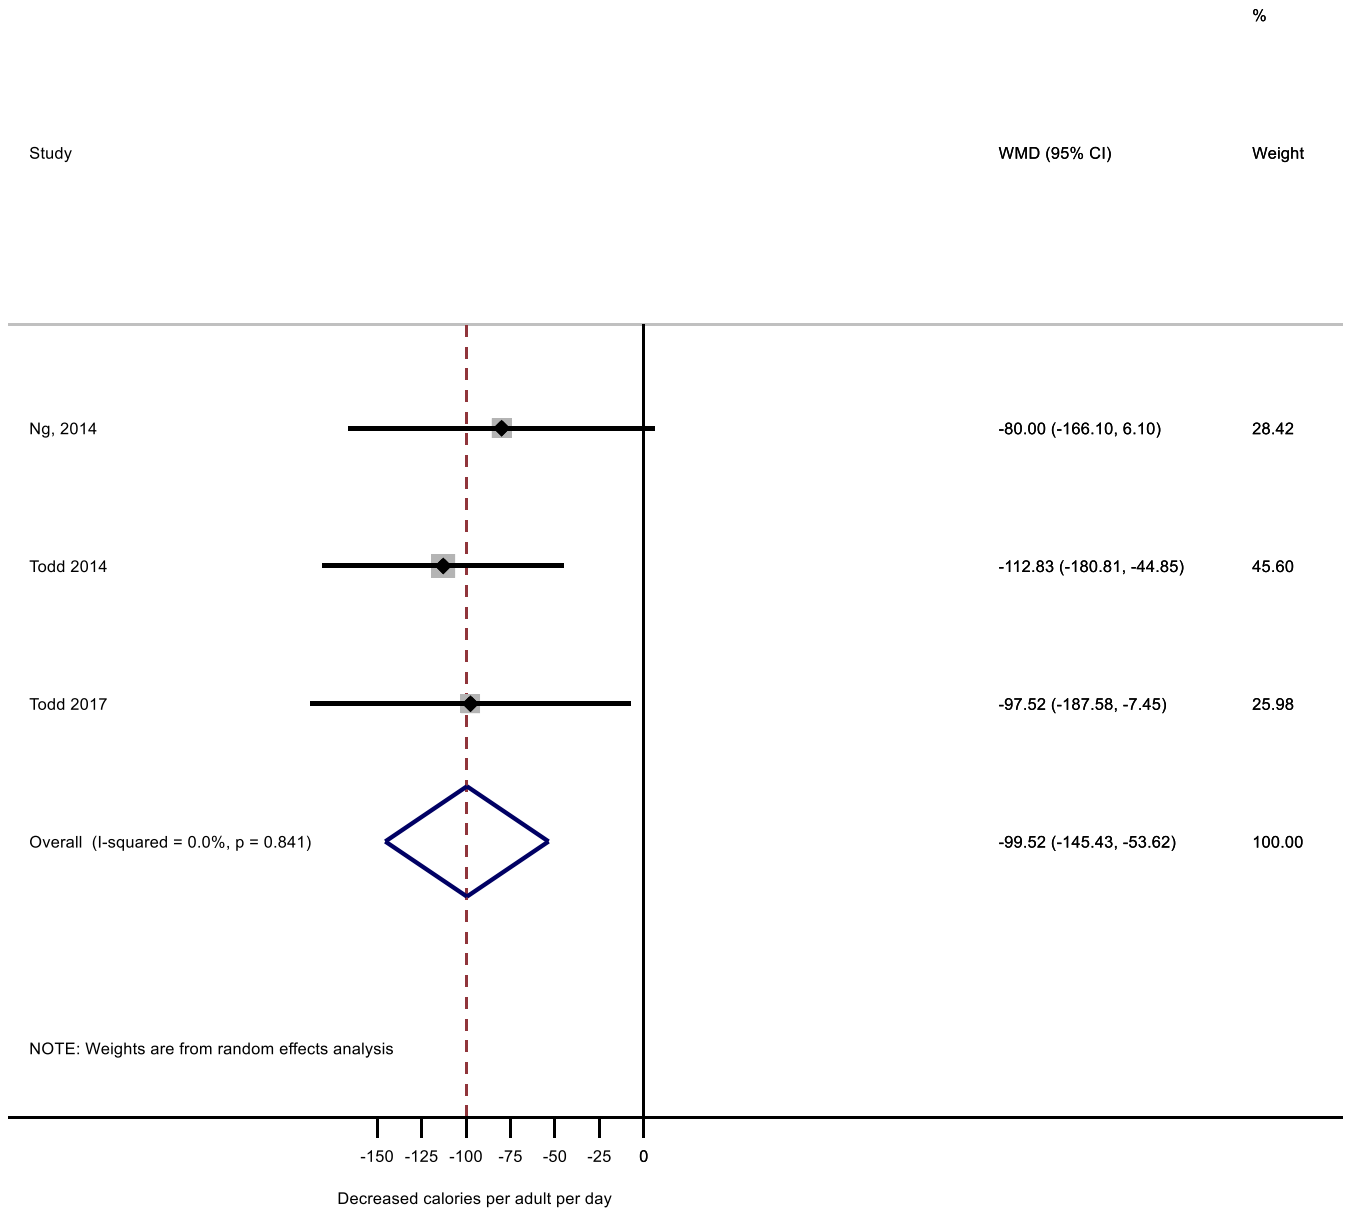

Supplement: 12966_2021_1125_MOESM2_ESM.pdf [file 12966_2021_1125_MOESM2_ESM.pdf]
